# Supplementary material for: Clinical and epidemiological characteristics of carbapenem-resistant Klebsiella pneumoniae infections in a tertiary hospital in China
Source: Research Square preprint supplement (doi:10.21203/rs.3.rs-153263/v2), 2021-02-24
Supplement: Supplementary file 1 [file 90dbef2eac0dc3f4f267b133.docx]

**Title page**

**Title:** Clinical and epidemiological characteristics of carbapenem-resistant *Klebsiella pneumoniae* infections in a tertiary hospital in China

Author names and affiliations**:**

Zhiwen Cui1

Lirui Wang1

Wei Chang1

Minghui Li1

Yuexia Li1

Min Feng1*

1 Intensive Care Unit, the First Affiliated Hospital of Zhengzhou University, Jianshe Road 1, Zhengzhou, Henan, China

*For correspondence: cyber86@qq.com, Tel: +8613838384720

All patients’ baseline characteristics of study cohort were listed in Table 1

**Table 1** Demographic and clinical characteristics of the study cohort

| *Variables* | *30-days outcome* | | | | | |
| --- | --- | --- | --- | --- | --- | --- |
| ALL, 480 | | Death, 179 | Survival, 301 | χ2 | *p*-value |
| Gender | | | | | | |
| ▪ Female | 191 | | 70 | 121 | 0.06 | 0.813 |
| ▪ Male | 289 | | 109 | 180 |  |  |
| Age | | | | | | |
| ▪ ≤60 | 209 | | 53 | 166 | 29.51 | <0.001 |
| ▪ >60 | 271 | | 126 | 135 |  |  |
| Wards | | | | | | |
| ▪ Respiratory ICU | | 104 | 34 | 70 | 1.2 | 0.273 |
| ▪ General ICU | | 110 | 47 | 63 | 1.8 | 0.18 |
| ▪ Surgical ICU | | 119 | 48 | 71 | 0.63 | 0.428 |
| ▪ Neurological ICU | | 111 | 34 | 77 | 2.74 | 0.098 |
| ▪ Emergency ICU | | 36 | 16 | 20 | 0.85 | 0.356 |
| Specimens | |  |  |  |  |  |
| ▪ BALF | | 379 | 120 | 259 | 24.41 | <0.001 |
| ▪ Blood and catheter tips | | 68 | 45 | 23 | 28.27 | <0.001 |
| ▪ Drainage liquid | | 21 | 7 | 14 |  |  |
| ▪ Urine | | 9 | 1 | 8 |  |  |
| ▪ Cerebrospinal fluid | | 3 | 3 | 0 |  |  |
| Comorbidities | |  |  |  |  |  |
| ▪ COPD | | 85 | 33 | 52 | 0.04 | 0.84 |
| ▪ Solid tumors | | 81 | 46 | 35 | 4.01 | 0.045 |
| ▪ Hematopathy | | 20 | 16 | 4 | 16.27 | <0.001 |
| ▪ Chronic liver disease | | 42 | 24 | 18 | 6.85 | 0.009 |
| ▪ Organ transplantation | | 20 | 11 | 9 | 2.06 | 0.15 |
| ▪ Coronary heart disease | | 169 | 72 | 97 | 2.81 | 0.094 |
| ▪ Hypertension | | 229 | 91 | 138 | 0.93 | 0.335 |
| ▪ Diabetes | | 97 | 49 | 48 | 8.4 | 0.004 |
| ▪ Infectious disease | | 87 | 36 | 51 | 0.56 | 0.454 |
| ▪ Tuberculosis | | 15 | 5 | 10 | 0.10 | 0.747 |
| ▪ CNS sequelae | | 105 | 35 | 70 | 0.70 | 0.404 |
| Acute comorbidities | |  |  |  |  |  |
| ▪ Septic shock | | 108 | 83 | 25 | 91.09 | <0.001 |
| ▪ Acute kidney injure | | 117 | 86 | 31 | 84.72 | <0.001 |
| ▪ Stroke | | 188 | 45 | 143 | 22.64 | <0.001 |
| ▪ Acute heart failure | | 39 | 17 | 22 | 0.72 | 0.396 |
| Pre-infection variables | |  |  |  |  |  |
| ▪ Central venous catheter | | 387 | 159 | 228 | 12.29 | ＜0.001 |
| ▪Intubation or tracheotomy | | 430 | 165 | 265 | 2.06 | 0.151 |
| ▪ CRRT | | 58 | 36 | 22 | 17.32 | ＜0.001 |
| ▪ Steroid therapy | | 93 | 40 | 53 | 1.61 | 0.2 |
| ▪ Immunosuppressive | | 23 | 14 | 9 | 5.74 | 0.017 |
| ▪ Chemoradiotherapy | | 19 | 13 | 6 | 8.20 | 0.004 |

The different antibiotic therapeutic regimens were listed in Table 2.

**Table 2** Tigecycline combination with other different antibiotics

| ***Tigecycline*** *and*  *other antibiotics* | *30-days outcome* | | | | | |
| --- | --- | --- | --- | --- | --- | --- |
| ALL | Death | Survive | Survive rate | χ2 | *p*-value |
| Imipenem | 97 | 45 | 52 | 53.6% | 5.432 | 0.246 |
| Meropenem | 39 | 12 | 27 | 69.2% |  | |
| Biapenem | 62 | 30 | 32 | 51.6% |  | |
| Ceftazidime avibactam | 24 | 7 | 17 | 70.8% |  | |
| 3rd or 4th ephalosporins | 39 | 16 | 21 | 56.8% |  | |
